# Supplementary material for: „Möchten Sie uns abschließend noch etwas mitteilen?“ – Auswertung der offenen Abschlussfrage in einem sozialwissenschaftlichen Survey
Source: Springer Nature journal article supplement (doi:10.1007/s16024-022-00376-0), 2022-08-09
Supplement: MOESM1 [file 23352692]

Codierschema

| Kategorienbezeichnung                                                                               |                                       | Definition/Inhaltliche Beschreibung                                                                          | Ankerbeispiel                                                                                                                                                                                                                                                                                                    |
|-----------------------------------------------------------------------------------------------------|---------------------------------------|--------------------------------------------------------------------------------------------------------------|------------------------------------------------------------------------------------------------------------------------------------------------------------------------------------------------------------------------------------------------------------------------------------------------------------------|
| Hauptkategorie                                                                                      | Subkategorie                          |                                                                                                              |                                                                                                                                                                                                                                                                                                                  |
| Funktionsebene (deduktiv gebildet)                                                                  | Inhaltliche Ebene (induktiv gebildet) |                                                                                                              |                                                                                                                                                                                                                                                                                                                  |
| Persönliche Ausführungen<br>(Codierregel: Es muss etwas Persönliches in der Antwort enthalten sein) |                                       | Berichte aus eigener Erfahrung, sehr persönliche Berichte                                                    | „Ich bin 72 Jahre; kann 20-25 km wandern; hüpfte nahezu täglich 30Min. auf dem Bellicon-Minitramp; 1x pro Woche Yoga und Qigong, bin in leitender Position ehrenamtlich tätig mit einem Zeitaufwand von durchschnittlich 10 Std. pro Woche.“ (FB 008)                                                            |
|                                                                                                     | Gesundheitszustand der Befragten      | Beschreibungen des persönlichen Gesundheitszustandes, gesundheitsbezogene Berichte                           | „Bin vor 3 Jahren an Brustkrebs erkrankt. Nach Chemo-OP-Bestrahlungen geheilt. Bin noch in Nachsorge. Positiv zu bleiben, ist der zuverlässigste Gesundheitszustand.“ (FB 167)                                                                                                                                   |
|                                                                                                     | Vorerfahrungen mit Pflege             | Erfahrungsberichte über professionelle und/oder informelle Pflege                                            | „Meine Mutter ist im Altenheim. Meine Wünsche für die Mutter, werden nicht ernst genommen. Sie ist introvertiert und soll trotzdem immer zu den Angeboten wie Singen, Tanzen, usw. gehen. Sie hat 80 Jahre nichts so gemacht und nun dieser Zwang. Finde ich das letzte und ist immer ein Streitpunkt.“ (FB 483) |
|                                                                                                     | Sorgen                                | Sorgen, Hoffnungslosigkeit, Ängste im Hinblick auf den letzten Lebensabschnitt bzw. Pflege                   | „Die Pflegekosten in den Altersheimen sind für mich unbegreiflich sehr hoch. [...] Bis ich in Pflege komme, kann ich das wahrscheinlich doch nicht mehr bezahlen.“ (FB 353)                                                                                                                                      |
|                                                                                                     | Aktivitäten                           | Beschreibungen, Berichte über Tätigkeiten und Aktivitäten (z. B. Sport, Ehrenamt oder familiales Engagement) | „Mache jeden Tag Sport, mindestens 3-4 Stunden wöchentlich. Ernähre mich mit viel Salat, Gemüse und Obst und hoffe, dass es mir noch lange so gut geht.“ (FB 584)                                                                                                                                                |

|                                                                                                    |                                               |                                                                                                                 |                                                                                                                                                                                                                                                                                                       |
|----------------------------------------------------------------------------------------------------|-----------------------------------------------|-----------------------------------------------------------------------------------------------------------------|-------------------------------------------------------------------------------------------------------------------------------------------------------------------------------------------------------------------------------------------------------------------------------------------------------|
|                                                                                                    | Glaube und Gegenwartsbezogenheit              | Anmerkungen bezüglich des Glaubens bzw. der Religion, keine Auseinandersetzung mit der Zukunft                  | „Mein christlicher Glaube lässt mich gelassen sein und hoffnungsvoll in die Zukunft blicken.“ (FB 035)<br>„Wenn man fit ist, kann man sich nicht vorstellen, dass es morgen schon anders sein kann! Deshalb leben wir den Tag und genießen alles in vollen Zügen.“ (FB 359)                           |
| Thematische Auseinandersetzung (Codierregel: Es muss Bezug zum Thema der Befragung enthalten sein) |                                               | Antworten zum Thema Pflege, pflegerische Versorgung, Finanzierung von Pflege, Versorgungssettings               | „Ich würde mehr Wohnangebote für rüstige Senioren im Sinne von Wohngemeinschaften begrüßen, mit dem Angebot von Gästezimmern und gemeinsamen Besorgungskonzept [...].“ (FB 025)                                                                                                                       |
|                                                                                                    | Pflegebezogene Wünsche                        | Wünsche, die Pflege Themen und/oder die Lebens- bzw. Versorgungssituation im Alter betreffen (weniger fordernd) | „Ich wünsche mir in Pflegebedürftigkeit Platz im Pflegeheim zu bekommen in meinem Wohnort, und nicht irgendwo, wo für mich nicht vertraut ist.“ (FB 486)                                                                                                                                              |
|                                                                                                    | Eigenverantwortung                            | Appelle und Anmerkungen bzgl. Eigenverantwortung                                                                | „Ich plädiere für ein gewisses Maß an Eigenverantwortung, das Alter sowie eine evtl. Pflegebedürftigkeit betreffend. Es kann nicht sein, dies dem "Staat", d. h. der Allgemeinheit aufzubürden. Jeder hat selbst zumindest in zumutbaren Maße, vorzusorgen.“ (FB 014)                                 |
|                                                                                                    | Ungerechtigkeitswahrnehmung                   | Mangelnde Gerechtigkeit des (Pflege-)Systems, Unzufriedenheit mit der Verteilung der Lasten/Aufwendungen        | „Ich finde es nicht richtig, dass für die Pflege das Vermögen, das für die Kinder erspart wurde, eingesetzt werden muss, da die Kinder das Heim bezahlen müssen. Diejenigen die das verpasst haben und nichts besitzen, da zahlt der Staat. Es ist ungerecht. Wer Kinder hat wird bestraft.“ (FB 306) |
|                                                                                                    | Forderungen an die Politik bzgl. Pflegesystem | Konkrete Vorschläge und Forderungen an die Politik betreffend des Pflegesystems und der Pflegefinanzierung      | „Es wäre sinnvoll und wünschenswert die Pflegekasse zu bezuschussen, zudem sollten die Sätze der Pflegeversicherung angehoben werden, damit die Zuzahlung bei der Pflege spürbar sinkt.“ (FB 404)                                                                                                     |

|                                                                                                                                              |                                                 |                                                                                                                                |                                                                                                                                                                                                                                                                                                                                                        |
|----------------------------------------------------------------------------------------------------------------------------------------------|-------------------------------------------------|--------------------------------------------------------------------------------------------------------------------------------|--------------------------------------------------------------------------------------------------------------------------------------------------------------------------------------------------------------------------------------------------------------------------------------------------------------------------------------------------------|
|                                                                                                                                              | Forderungen an die Politik bzgl. Pflegepersonal | Forderungen bezüglich des Pflegepersonals sowie deren Einsatz                                                                  | „Das Pflegepersonal sollte wesentlich besser bezahlt werden. Weniger Schreibearbeit und mehr Zeit für den Mensch der krank ist.“ (FB 402)                                                                                                                                                                                                              |
|                                                                                                                                              | Gesellschaftspolitische Forderungen             | Forderungen an die Gesellschaft                                                                                                | „Am besten wäre es, wenn die eigenen Kinder bereit wären, die Eltern zumindest zum Teil zu betreuen, zu pflegen. Das ist eine moralische Frage, die stärker in den Mittelpunkt gehört.“ (FB 1037)                                                                                                                                                      |
| Anmerkungen zum Fragebogen<br>(Codierregel: Lob, Anregung, Kritik, Verbesserungsvorschläge den Fragebogen bzw. die Befragung betreffend)     |                                                 | Formale und inhaltliche Anmerkungen zur Befragung, zum Fragebogen und/oder den Fragen                                          | „Ich mag keine Multiple Choice Fragen.“ (FB 090)<br>„Sehr gut strukturierte Befragung! Jedoch ein Fehler: Ich selbst zahle als pensionierter Beamter auch heute monatlich 29,36 € in die Pflegeversicherung an die GPV (Gemeinschaft privater Versicherungsunternehmer) und zwar nicht freiwillig, sondern über die Postbeamtenkrankenkasse!“ (FB 227) |
| Ermutigendes/Freude<br>(Codierregel: Nur Positives über die Befragung (steilnahme), wenn nicht explizit auf den Fragebogen hingewiesen wird) |                                                 | Hinweise auf Bedeutung des Themas, Dankbarkeit für die Bearbeitung des Themas;<br>Positives zur Umfrage; Freude über Teilnahme | „Vielen Dank für die dringend notwendige Befragung.“ (FB 311)                                                                                                                                                                                                                                                                                          |
| Sonstiges<br>(Codierregel: Wenn keine andere sinnvolle Zuordnung möglich ist)                                                                |                                                 | Keine Zuordnung möglich (da unvollständige Sätze oder kein Inhalt erkennbar); Entschuldigung für verspätete Abgabe             | „Entschuldigung für die verspätete Abgabe.“ (FB 454)                                                                                                                                                                                                                                                                                                   |
